# Supplementary material
Source: MDPI journal article supplement (https://www.mdpi.com/2073-4468/11/2/33)
Supplement: s1 [file s1]

Supplementary material

# MPO–ANCA-Positive Granulomatosis with Polyangiitis with Rapidly Progressive Glomerulonephritis and Saddle-Nose Deformity: A Case Report

Dimitra Petrou <sup>1</sup>, Minas Karagiannis <sup>1</sup>, Petros Nikolopoulos <sup>1</sup>, George Liapis <sup>2</sup> and Sophia Lionaki <sup>1,\*</sup>

<sup>1</sup> Department of Nephrology, National and Kapodistrian University of Athens, Attikon Hospital, 12462 Athens, Greece; dimitra.petrou90@gmail.com (D.P.); minaskar64@gmail.com (M.K.); nikolopoulospetros@gmail.com (P.N.)

<sup>2</sup> Department of Pathology, National and Kapodistrian University of Athens, Laiko Hospital, 11527 Athens, Greece; gliapis@gmail.com

\* Correspondence: sophial@med.uoa.gr

**Citation:** Petrou, D.; Karagiannis, M.; Nikolopoulos, P.; Liapis, G.; Lionaki, S. MPO–ANCA-Positive Granulomatosis with Polyangiitis with Rapidly Progressive Glomerulonephritis and Saddle-Nose Deformity: A Case Report. *Antibodies* **2022**, *11*, 33. <https://doi.org/10.3390/antib11020033>

Academic Editor: Loredana Frasca

Received: 27 February 2022

Accepted: 1 May 2022

Published: 9 May 2022

**Publisher's Note:** MDPI stays neutral with regard to jurisdictional claims in published maps and institutional affiliations.

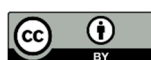

**Copyright:** © 2022 by the authors. Licensee MDPI, Basel, Switzerland. This article is an open access article distributed under the terms and conditions of the Creative Commons Attribution (CC BY) license (<https://creativecommons.org/licenses/by/4.0/>).

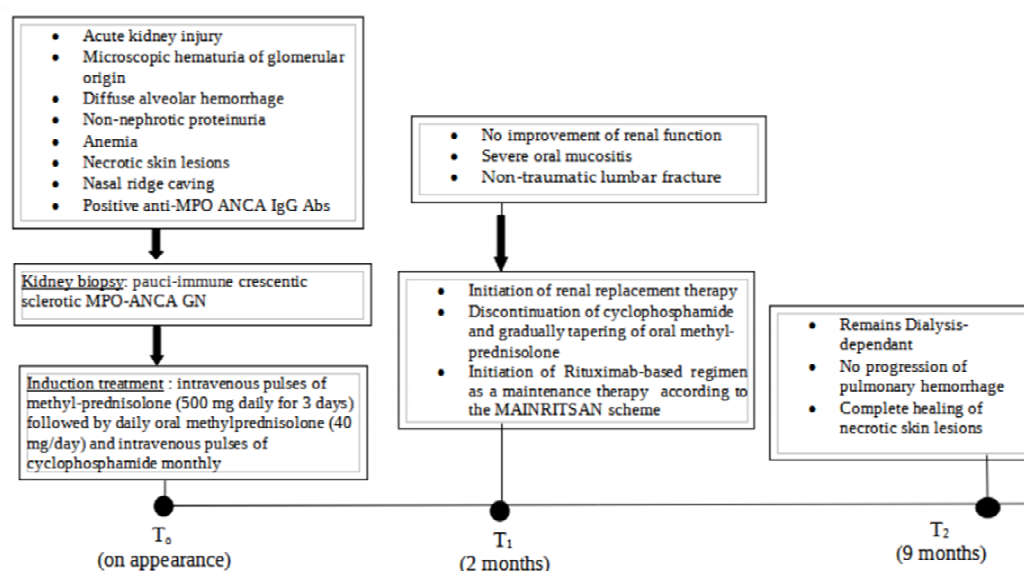

**Figure S1.** Timeline.
